# Supplementary material for: Comparing Depression Prevalence and Associated Symptoms with Intolerance of Uncertainty among Chinese Urban and Rural Adolescents: A Network Analysis
Source: MDPI journal article supplement (doi:10.3390/bs13080662), 2023-08-08
Supplement: s1 [file s1]

Table S1. The edge weights matrix among all adolescence.

|      | PHQ1  | PHQ2  | PHQ3  | PHQ4   | PHQ5  | PHQ6  | PHQ7  | PHQ8  | PHQ9   |
|------|-------|-------|-------|--------|-------|-------|-------|-------|--------|
| PHQ1 | 0     | 0.353 | 0.056 | 0.295  | 0.045 | 0     | 0.141 | 0.067 | 0.014  |
| PHQ2 | 0.353 | 0     | 0.155 | 0.120  | 0.067 | 0.180 | 0     | 0.080 | 0.077  |
| PHQ3 | 0.056 | 0.155 | 0     | 0.281  | 0.114 | 0.036 | 0     | 0.014 | 0.087  |
| PHQ4 | 0.295 | 0.120 | 0.281 | 0      | 0.156 | 0.036 | 0.188 | 0.070 | -0.066 |
| PHQ5 | 0.045 | 0.067 | 0.114 | 0.156  | 0     | 0.168 | 0.071 | 0.094 | 0.110  |
| PHQ6 | 0     | 0.180 | 0.036 | 0.036  | 0.168 | 0     | 0.166 | 0.209 | 0.175  |
| PHQ7 | 0.141 | 0     | 0     | 0.188  | 0.071 | 0.166 | 0     | 0.250 | 0.001  |
| PHQ8 | 0.067 | 0.080 | 0.014 | 0.070  | 0.094 | 0.209 | 0.250 | 0     | 0.323  |
| PHQ9 | 0.014 | 0.077 | 0.087 | -0.066 | 0.110 | 0.175 | 0.001 | 0.323 | 0      |

Table S2. The edge weights matrix among adolescence in the urban.

|      | PHQ1  | PHQ2  | PHQ3  | PHQ4  | PHQ5  | PHQ6  | PHQ7  | PHQ8  | PHQ9  |
|------|-------|-------|-------|-------|-------|-------|-------|-------|-------|
| PHQ1 | 0     | 0.344 | 0.005 | 0.325 | 0.133 | 0     | 0.107 | 0     | 0.031 |
| PHQ2 | 0.344 | 0     | 0.224 | 0.152 | 0.035 | 0.138 | 0     | 0.059 | 0.053 |
| PHQ3 | 0.005 | 0.224 | 0     | 0.323 | 0.069 | 0.023 | 0     | 0.098 | 0.037 |
| PHQ4 | 0.325 | 0.152 | 0.323 | 0     | 0.123 | 0.008 | 0.123 | 0.013 | 0     |
| PHQ5 | 0.133 | 0.035 | 0.069 | 0.123 | 0     | 0.218 | 0.063 | 0.139 | 0.106 |
| PHQ6 | 0     | 0.138 | 0.023 | 0.008 | 0.218 | 0     | 0.126 | 0.270 | 0.160 |
| PHQ7 | 0.107 | 0     | 0     | 0.123 | 0.063 | 0.126 | 0     | 0.307 | 0.003 |
| PHQ8 | 0     | 0.059 | 0.098 | 0.013 | 0.139 | 0.270 | 0.307 | 0     | 0.265 |
| PHQ9 | 0.031 | 0.053 | 0.037 | 0     | 0.106 | 0.160 | 0.003 | 0.265 | 0     |

Table S3. The edge weights matrix among adolescence in rural.

|      | PHQ1  | PHQ2  | PHQ3  | PHQ4   | PHQ5  | PHQ6  | PHQ7  | PHQ8  | PHQ9   |
|------|-------|-------|-------|--------|-------|-------|-------|-------|--------|
| PHQ1 | 0     | 0.348 | 0.081 | 0.271  | 0.004 | 0.019 | 0.158 | 0.103 | 0      |
| PHQ2 | 0.348 | 0     | 0.125 | 0.100  | 0.090 | 0.199 | 0     | 0.092 | 0.085  |
| PHQ3 | 0.081 | 0.125 | 0     | 0.256  | 0.133 | 0.037 | 0     | 0     | 0.095  |
| PHQ4 | 0.271 | 0.100 | 0.256 | 0      | 0.172 | 0.046 | 0.224 | 0.088 | -0.071 |
| PHQ5 | 0.004 | 0.090 | 0.133 | 0.172  | 0     | 0.141 | 0.076 | 0.077 | 0.113  |
| PHQ6 | 0.019 | 0.199 | 0.037 | 0.046  | 0.141 | 0     | 0.174 | 0.172 | 0.180  |
| PHQ7 | 0.158 | 0     | 0     | 0.224  | 0.076 | 0.174 | 0     | 0.215 | 0      |
| PHQ8 | 0.103 | 0.092 | 0     | 0.088  | 0.077 | 0.172 | 0.215 | 0     | 0.339  |
| PHQ9 | 0     | 0.085 | 0.095 | -0.071 | 0.113 | 0.180 | 0     | 0.339 | 0      |

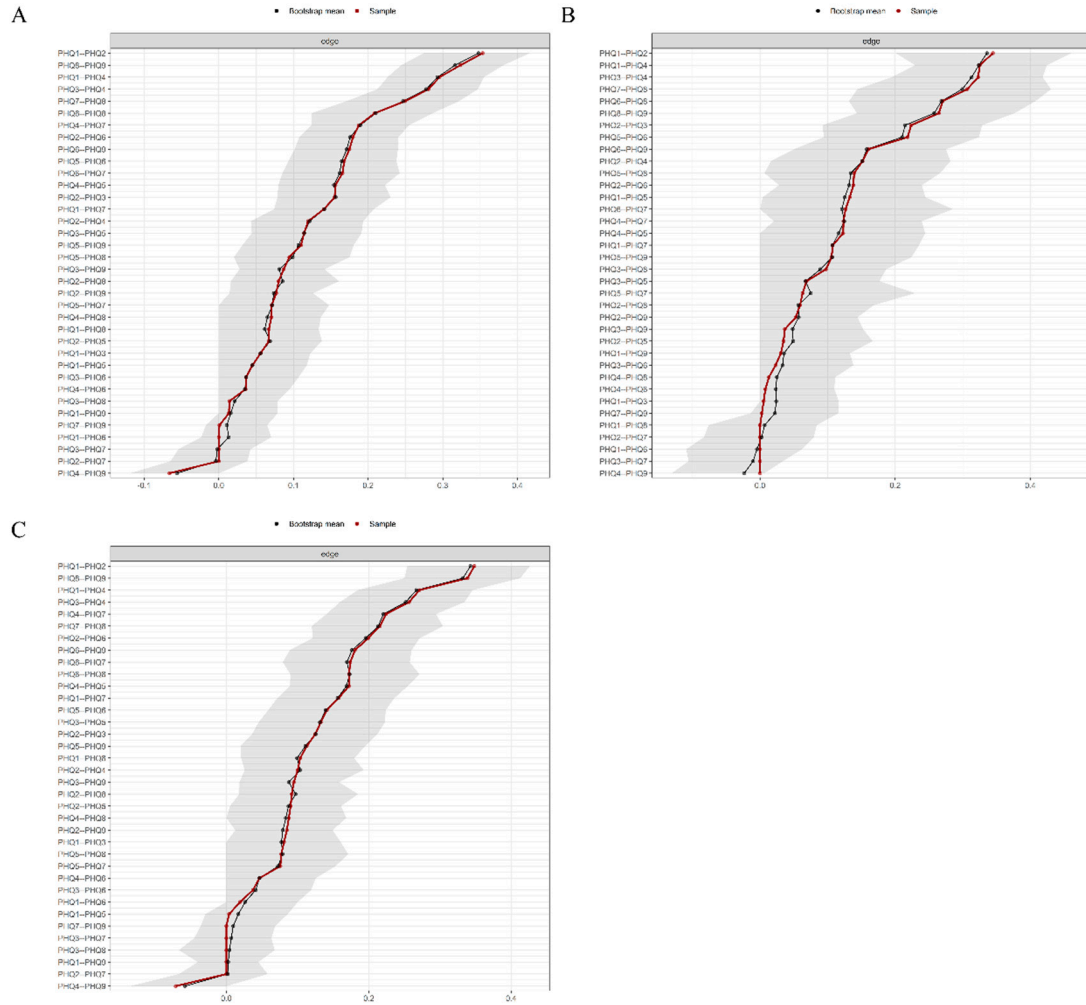

Figure S1. Nonparametric bootstrapped confidence intervals of estimated edges. The red line represents the estimated edge, while the dark area indicates the 95% bootstrap confidence interval. A indicates all adolescents. B indicates adolescence in the urban. C indicates adolescence in rural.

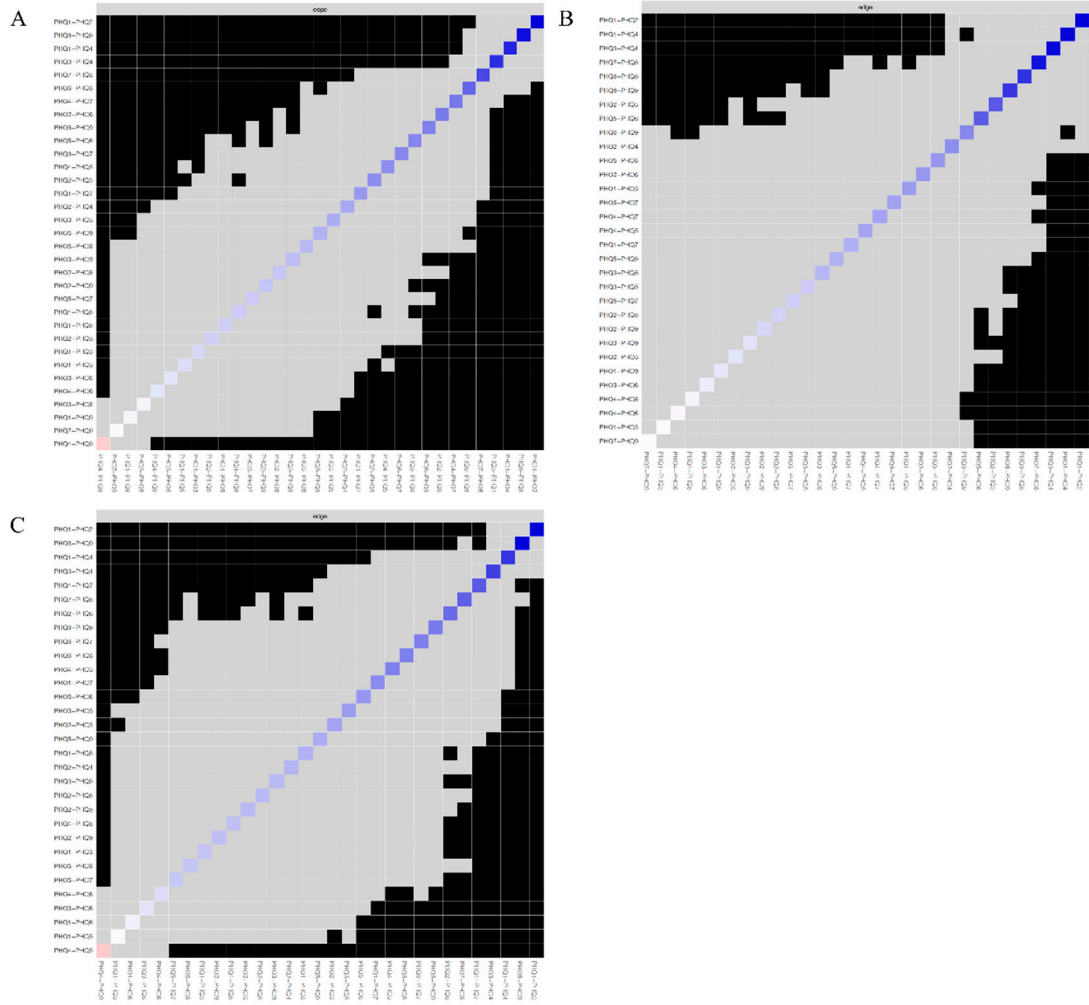

Figure S2. Bootstrapped stability test for edge-weight. The results of the bootstrapped difference tests ( $\alpha=0.05$ ) for edge-weights were shown in this figure. The color of the boxes indicates whether edge-weights differ significantly from each other (i.e., black) or do not differ significantly (i.e., grey). The diagonal line indicates the strength of edge-weights, shifting from red (negative associations) to white (representing weaker edges) and ultimately blue (representing stronger edge-weights). A indicates all adolescents. B indicates adolescence in the urban. C indicates adolescence in rural.

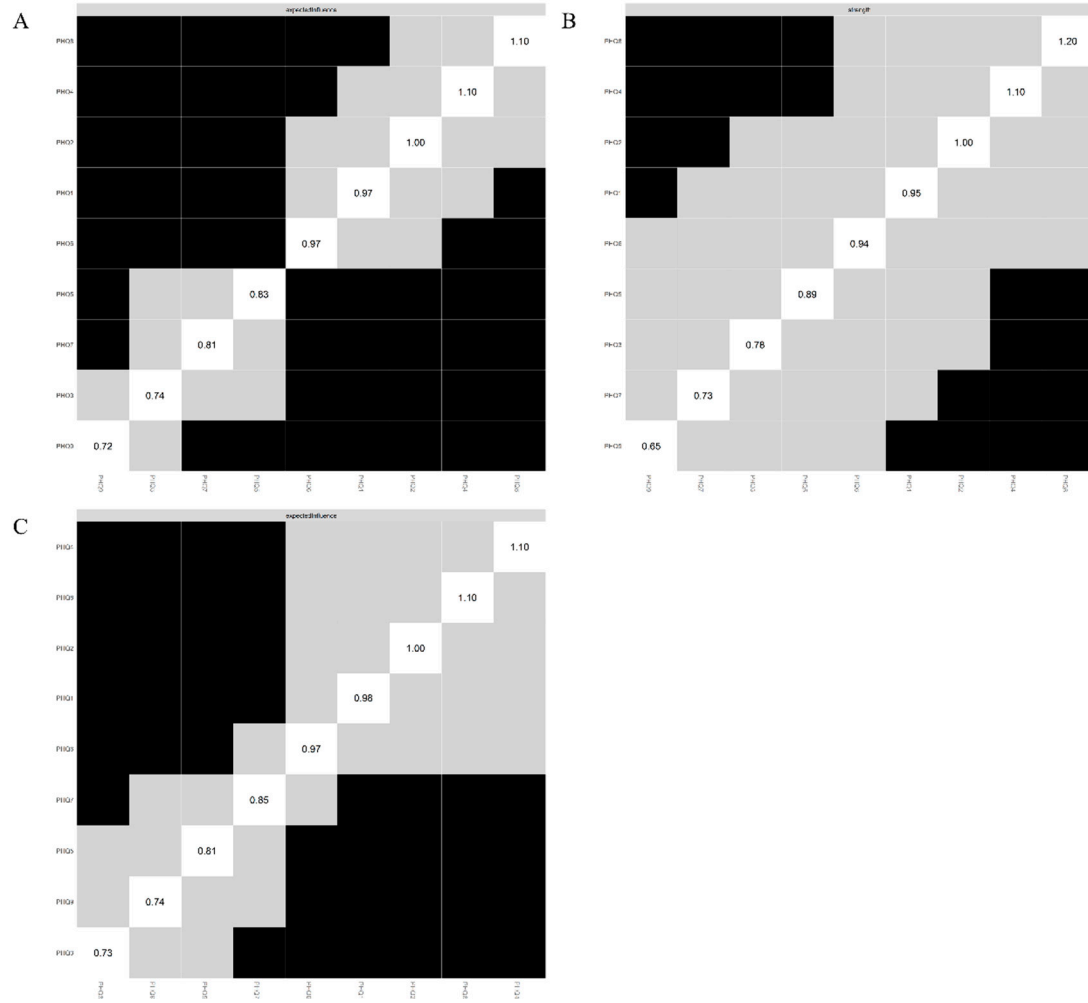

Figure S3. Bootstrapped stability test for edge-weight. The results of the bootstrapped difference tests ( $\alpha=0.05$ ) for edge-weights were shown in this figure. The colour of the boxes indicates whether edge-weights differ significantly from each other (i.e., black) or do not differ significantly (i.e., grey). A indicates all adolescents. B indicates adolescence in the urban. C indicates adolescence in rural.
